# Supplementary material for: Microsymbiont diversity and phylogeny of native bradyrhizobia associated with soybean (Glycine max L. Merr.) nodulation in South African soils
Source: PubMed Central journal article supplement (PMC4958686; doi:10.1016/j.syapm.2016.05.009), 2016-07
Supplement: mmc1.pdf [file mmc1.pdf]

**Microsymbiont diversity and phylogeny of native bradyrhizobia associated with soybean (*Glycine max* L. Merr.) nodulation in South African soils**

Judith Naamala<sup>1</sup>, Sanjay K Jaiswal<sup>2</sup>, Felix D Dakora<sup>2</sup>

**Table S1**

Site description and diversity index of collected soybean bradyrhizobial isolates.

| S. No. | Province  | No. of sites sampled | Isolates designation | number of isolates                                                                        | Shannon diversity index (H') | Climatic conditions                                                         |
|--------|-----------|----------------------|----------------------|-------------------------------------------------------------------------------------------|------------------------------|-----------------------------------------------------------------------------|
| 1.     | Mpumlanga | 19                   | TUTMP                | 60 (1-60)<br>[(1-54) obtained from farmer fields' nodules; (55-60) from glass house test] | 1.47                         | Rain fall 620 mm (Lowveld)- 878 mm (Highveld), 1-35 °C temperature annually |
| 2.     | Limpopo   | 7                    | TUTLI                | 38 (63-100) glass house                                                                   | 1.37                         | Rain fall 788 mm, temperature 4-45 °C annually                              |
| 3.     | Gauteng   | 1                    | TUTGP                | 2 (61-62) glass house                                                                     | 0.69                         | Rain fall 683 mm, temperature 5-30 °C annually                              |

**Table S2**

Primers and PCR temperature profiles used for DNA amplification.

| Gene name   | Primer Sequence (5' – 3')                                             | Temperature profile                                                                                                                  | References |
|-------------|-----------------------------------------------------------------------|--------------------------------------------------------------------------------------------------------------------------------------|------------|
| 16S rDNA    | fD1 (9-29)AGAGTTTGATCCTGGCTCAG<br>rD1 (1474-1494)CTTAAGGAGGTGATCCAGCC | 5 min 95 °C, 35 X (1 min 95 °C, 1 min 55 °C, 1 min 72 °C), 10 min 72 °C                                                              | [38]       |
| <i>nifH</i> | 28f-TACGGNAARGGSGGNATCGGCAA<br>809r-AGCATGTCYTCSAGYYTCNTCCA           | 5 min 94 °C, 20 X [30 s 94 °C, 30 s 65 °C (-0.5 °C / cycle), 90 s 72 °C],<br>25 X (30 s 94 °C, 30 s 65 °C, 90 s 72 °C), 10 min 72 °C | [43]       |
| <i>glnI</i> | 13f-AAGCTCGAGTACATCTGGCTCGACGG<br>681r-SGAGCCGTTCCAGTCGGTGGTGTCG      | 2 min 95 °C, 35 X (45 s 95 °C, 30 s 65 °C, 90 s 72 °C), 10 min 72 °C                                                                 | [52]       |
| <i>gyrB</i> | 343f-TTCGACCAGAAATCCTAYAAGG<br>1043r-AGCTTGTCTTSGTCTGCG               | 10 min 95 °C, 35 X (30 s 94 °C, 30 s 58 °C, 1 min 72 °C), 10 min 72 °C                                                               | [36]       |
| <i>atpD</i> | 189f- TCTGGTCCGYGGCCAGGAAG<br>804r-CGACACTTCCGARCCSGCCTG              | 2 min 95 °C, 35 X (45 s 95 °C, 30 s 65 °C, 90 s 72 °C), 10 min 72 °C                                                                 | [52]       |

**Table S3**

Accession numbers of the gene sequences of the soybean nodulating isolates used for the phylogenetic study

| Strain        | 16S rDNA | <i>atpD</i> | <i>gyrB</i> | <i>glnII</i> | <i>nifH</i> |
|---------------|----------|-------------|-------------|--------------|-------------|
| TUTMP16.11    | KT148835 | KT027870    | KT027910    | KT027888     | KT027851    |
| TUTMP18.6     | KT148836 | KT027871    | KT027911    | KT027889     | KT027852    |
| TUTMP18.11    | KT148837 | KT027876    | KT027912    | KT027890     | KT027853    |
| TUTMP19.10    |          | KT027877    | KT027913    | KT027891     | KT027854    |
| TUTLI2.20.6   | KT729525 | KT027878    | KT027914    | KT027893     | KT027855    |
| TUTLI2.10.7   | KT729524 | KT027879    | KT027915    | KT027894     | KT027856    |
| TUTLI4.10.5b  |          | KT027880    | KT027916    | KT027895     | KT027857    |
| TUTLI4.10.7   | KT729526 | KT027881    | KT027917    | KT027896     | KT027858    |
| TUTLI4.10.9   | KT729522 | KT027882    | KT027918    | KT027897     | KT027859    |
| TUTLI7.10.3   |          | KT027883    |             | KT027898     | KT027860    |
| TUTLI8.20.5   |          | KT027884    | KT027919    | KT027903     | KT027861    |
| TUTMP2.9      | KT148839 | KT027885    | KT027920    | KT027899     | KT027862    |
| TUTMP7.7      | KT148840 | KT027872    | KT027921    | KT027900     | KT027863    |
| TUTMP9.7      | KT148841 | KT027873    | KT027922    | KT027901     | KT027864    |
| TUTMP12.13    |          | KT027875    | KT027924    | KT027902     | KT027865    |
| TUTMP14.10.3b |          |             | KT027926    |              | KT027866    |
| TUTGP10.10.2  | KT148838 |             |             | KT027892     | KT027867    |
| TUTLI2.20.7   | KT729523 | KT351629    | KT027927    | KT027906     | KT027868    |
| TUTMP10.6     |          | KT027886    |             | KT027904     | KT027869    |
| TUTMP11.7     |          | KT027874    | KT027923    | KT027905     |             |
| TUTMP14.20.2  |          | KT027887    | KT027925    | KT027909     |             |
| TUTMP17.10.2  |          |             |             | KT027908     |             |
| TUTMP14.10.3  |          | KT351628    | KT027928    | KT027907     |             |

**Table S4**

Phenotypic and 16S rDNA-RFLP characteristics of soybean nodulating bradyrhizobia.

| Number used in RFLP-dendrogram | Isolate designation | Field history                 | Restriction patterns (MspI/RsaI/HaeIII) | Reaction to BTB | Colony appeared on YMA plate (days) | Colony shape |
|--------------------------------|---------------------|-------------------------------|-----------------------------------------|-----------------|-------------------------------------|--------------|
| 1                              | TUTMP1.7            | Uninoculated                  | GFA                                     | Blue            | 10                                  | Oval         |
| 2                              | TUTMP1.10           | Uninoculated                  | NFE                                     | Blue            | 9                                   | Domed        |
| 3                              | TUTMP2.9            | Inoc. ( <i>B. japonicum</i> ) | GDR                                     | Blue            | 9                                   | Domed        |
| 4                              | TUTMP2.11           | Inoc. ( <i>B. japonicum</i> ) | KGD                                     | Blue            | 10                                  | Domed        |
| 5                              | TUTMP2.13           | Inoc. ( <i>B. japonicum</i> ) | NLE                                     | Blue            | 10                                  | Domed        |
| 6                              | TUTMP3.7            | Uninoculated                  | MGS                                     | Blue            | 9                                   | Domed        |
| 7                              | TUTMP3.13           | Uninoculated                  | GDD                                     | Blue            | 12                                  | Flat         |
| 8                              | TUTMP4.2            | Uninoculated                  | EF-                                     | Blue            | 7                                   | Domed        |
| 9                              | TUTMP4.13           | Uninoculated                  | GDR                                     | Blue            | 13                                  | Flat         |
| 10                             | TUTMP5.1            | Inoc. ( <i>B. japonicum</i> ) | BBA                                     | Blue            | 9                                   | Domed        |
| 11                             | TUTMP5.2            | Inoc. ( <i>B. japonicum</i> ) | BIA                                     | Blue            | 8                                   | Domed        |
| 12                             | TUTMP5.3            | Inoc. ( <i>B. japonicum</i> ) | NLE                                     | Blue            | 8                                   | Domed        |
| 13                             | TUTMP5.4a           | Inoc. ( <i>B. japonicum</i> ) | BBR                                     | Blue            | 9                                   | Domed        |
| 14                             | TUTMP5.4b           | Inoc. ( <i>B. japonicum</i> ) | BBA                                     | Blue            | 12                                  | Domed        |
| 15                             | TUTMP5.5            | Inoc. ( <i>B. japonicum</i> ) | EDD                                     | Blue            | 5                                   | Domed        |
| 16                             | TUTMP5.6            | Inoc. ( <i>B. japonicum</i> ) | NLE                                     | Blue            | 7                                   | Domed        |
| 17                             | TUTMP5.7            | Inoc. ( <i>B. japonicum</i> ) | GDD                                     | Blue            | 14                                  | Domed        |
| 18                             | TUTMP5.12           | Inoc. ( <i>B. japonicum</i> ) | BBA                                     | Blue            | 9                                   | Domed        |
| 19                             | TUTMP5.16           | Inoc. ( <i>B. japonicum</i> ) | NLA                                     | Yellow          | 11                                  | Flat         |
| 20                             | TUTMP6.1            | Inoc. ( <i>B. japonicum</i> ) | LLL                                     | Blue            | 9                                   | Domed        |
| 21                             | TUTMP6.4            | Inoc. ( <i>B. japonicum</i> ) | GDD                                     | Blue            | 12                                  | Domed        |
| 22                             | TUTMP6.8            | Inoc. ( <i>B. japonicum</i> ) | --D                                     | Blue            | 9                                   | Flat         |
| 23                             | TUTMP6.20           | Inoc. ( <i>B. japonicum</i> ) | NFG                                     | Blue            | 7                                   | Domed        |
| 24                             | TUTMP7.7            | Inoc. ( <i>B. japonicum</i> ) | CJC                                     | Blue            | 10                                  | Domed        |
| 25                             | TUTMP8.7            | Inoc. ( <i>B. japonicum</i> ) | BBR                                     | Blue            | 12                                  | Domed        |
| 26                             | TUTMP8.9            | Inoc. ( <i>B. japonicum</i> ) | LLG                                     | Blue            | 6                                   | Domed        |
| 27                             | TUTMP8.14           | Inoc. ( <i>B. japonicum</i> ) | LKI                                     | Blue            | 9                                   | Conical      |
| 28                             | TUTMP9.3            | Uninoculated                  | GDA                                     | Blue            | 10                                  | Domed        |
| 29                             | TUTMP9.5            | Uninoculated                  | NLE                                     | Blue            | 9                                   | Domed        |
| 30                             | TUTMP9.7            | Uninoculated                  | BBA                                     | Blue            | 9                                   | Domed        |
| 31                             | TUTMP9.11           | Uninoculated                  | OOS                                     | Blue            | 12                                  | Domed        |
| 32                             | TUTMP10.6           | Inoc. ( <i>B. japonicum</i> ) | GDR                                     | Blue            | 14                                  | Domed        |
| 33                             | TUTMP10.7           | Inoc. ( <i>B. japonicum</i> ) | BBA                                     | Blue            | 9                                   | Domed        |
| 34                             | TUTMP10.8           | Inoc. ( <i>B. japonicum</i> ) | NFG                                     | Blue            | 6                                   | Domed        |
| 35                             | TUTMP10.10          | Inoc. ( <i>B. japonicum</i> ) | NLE                                     | Blue            | 10                                  | Domed        |
| 36                             | TUTMP10.11          | Inoc. ( <i>B. japonicum</i> ) | NLE                                     | Blue            | 13                                  | Domed        |

|    |               |                               |     |        |    |         |
|----|---------------|-------------------------------|-----|--------|----|---------|
| 37 | TUTMP11.1     | Inoc. ( <i>B. japonicum</i> ) | NFE | Yellow | 10 | Domed   |
| 38 | TUTMP11.3     | Inoc. ( <i>B. japonicum</i> ) | GDD | Blue   | 12 | Domed   |
| 39 | TUTMP11.7     | Inoc. ( <i>B. japonicum</i> ) | GDR | Blue   | 8  | Domed   |
| 40 | TUTMP11.8     | Inoc. ( <i>B. japonicum</i> ) | NLE | Blue   | 10 | Domed   |
| 41 | TUTMP11.9     | Inoc. ( <i>B. japonicum</i> ) | BBR | Blue   | 8  | Domed   |
| 42 | TUTMP11.13    | Inoc. ( <i>B. japonicum</i> ) | BFD | Blue   | 8  | Domed   |
| 43 | TUTMP11.14    | Inoc. ( <i>B. japonicum</i> ) | NFE | Blue   | 12 | Domed   |
| 44 | TUTMP12.13    | Inoc. ( <i>B. japonicum</i> ) | GDD | Blue   | 9  | Domed   |
| 45 | TUTMP15.3     | Uninoculated                  | ELF | Blue   | 5  | Domed   |
| 46 | TUTMP15.11    | Uninoculated                  | BBA | Blue   | 12 | Domed   |
| 47 | TUTMP16.2     | Uninoculated                  | NLF | Yellow | 3  | Conical |
| 48 | TUTMP16.11    | Uninoculated                  | LFG | Blue   | 10 | Domed   |
| 49 | TUTMP17.15    | Uninoculated                  | GDR | Blue   | 9  | Domed   |
| 50 | TUTMP18.6     | Uninoculated                  | NLE | Blue   | 8  | Domed   |
| 51 | TUTMP18.11    | Uninoculated                  | GDD | Blue   | 12 | Domed   |
| 52 | TUTMP19.10    | Uninoculated                  | LLG | Yellow | 8  | Domed   |
| 53 | TUTMP20.8     | Uninoculated                  | GDA | Blue   | 10 | Conical |
| 54 | TUTMP20.18    | Uninoculated                  | MGA | Blue   | 12 | Flat    |
| 55 | TUTMP14.10.1  | Uninoculated                  | PDI | Yellow | 4  | Domed   |
| 56 | TUTMP14.20.2  | Uninoculated                  | EDI | Blue   | 10 | Domed   |
| 57 | TUTMP14.10.3  | Uninoculated                  | EDI | Yellow | 2  | Domed   |
| 58 | TUTMP14.10.3b | Uninoculated                  | HDM | Yellow | 2  | Domed   |
| 59 | TUTMP17.10.1  | Uninoculated                  | DBB | Blue   | 9  | Domed   |
| 60 | TUTMP17.10.2  | Uninoculated                  | DBQ | Yellow | 8  | Domed   |
| 61 | TUTGP10.10.1  | Uninoculated                  | CCN | Blue   | 2  | Domed   |
| 62 | TUTGP10.10.2  | Uninoculated                  | --A | Blue   | 7  | Domed   |
| 63 | TUTLI1.10.3   | Uninoculated                  | JHH | Yellow | 2  | Domed   |
| 64 | TUTLI1.10.3b  | Uninoculated                  | FEJ | Blue   | 6  | Domed   |
| 65 | TUTLI1.10.4   | Uninoculated                  | PGC | Yellow | 2  | Domed   |
| 66 | TUTLI2.10.1   | Uninoculated                  | AAA | Blue   | 6  | Domed   |
| 67 | TUTLI2.20.1   | Uninoculated                  | AAA | Blue   | 6  | Conical |
| 68 | TUTLI2.20.5   | Uninoculated                  | AA- | Blue   | 6  | Domed   |
| 69 | TUTLI2.20.6   | Uninoculated                  | BBA | Blue   | 8  | Conical |
| 70 | TUTLI2.20.7   | Uninoculated                  | -AA | Yellow | 2  | Domed   |
| 71 | TUTLI2.10.7   | Uninoculated                  | BBA | Blue   | 6  | Domed   |
| 72 | TUTLI2.10.7b  | Uninoculated                  | BBA | Blue   | 7  | Domed   |
| 73 | TUTLI3.10.3   | Uninoculated                  | AAM | Blue   | 10 | Domed   |
| 74 | TUTLI4.20.3   | Uninoculated                  | AAA | Blue   | 10 | Domed   |
| 75 | TUTLI4.20.4   | Uninoculated                  | GDD | Blue   | 6  | Domed   |
| 76 | TUTLI4.10.5   | Uninoculated                  | BBA | Blue   | 8  | Domed   |
| 77 | TUTLI4.10.5b  | Uninoculated                  | LEJ | Blue   | 8  | Domed   |
| 78 | TUTLI4.20.5   | Uninoculated                  | GHP | Yellow | 2  | Domed   |
| 79 | TUTLI4.10.6   | Uninoculated                  | --A | Blue   | 6  | Domed   |

|     |              |              |     |        |    |       |
|-----|--------------|--------------|-----|--------|----|-------|
| 80  | TUTLI4.10.7  | Uninoculated | AAA | Blue   | 6  | Domed |
| 81  | TUTLI4.10.9  | Uninoculated | AAA | Blue   | 6  | Domed |
| 82  | TUTLI4.10.9b | Uninoculated | AAA | Blue   | 5  | Domed |
| 83  | TUTLI4.20.10 | Uninoculated | BBA | Blue   | 8  | Domed |
| 84  | TUTLI4.20.11 | Uninoculated | GDD | Blue   | 9  | Domed |
| 85  | TUTLI4.10.12 | Uninoculated | AAA | Blue   | 7  | Domed |
| 86  | TUTLI4.20.16 | Uninoculated | KHO | Yellow | 3  | Domed |
| 87  | TUTLI7.10.3  | Uninoculated | GDD | Blue   | 9  | Domed |
| 88  | TUTLI7.10.4  | Uninoculated | -AA | Blue   | 10 | Domed |
| 89  | TUTLI7.10.6  | Uninoculated | NBA | Blue   | 8  | Domed |
| 90  | TUTLI7.10.7  | Uninoculated | BBA | Blue   | 6  | Domed |
| 91  | TUTLI8.10.1  | Uninoculated | BBA | Blue   | 4  | Domed |
| 92  | TUTLI8.20.1  | Uninoculated | DBB | Yellow | 3  | Domed |
| 93  | TUTLI8.10.3  | Uninoculated | AAA | Blue   | 8  | Domed |
| 94  | TUTLI8.20.4  | Uninoculated | GDD | Blue   | 13 | Domed |
| 95  | TUTLI8.20.5  | Uninoculated | IGK | Yellow | 3  | Flat  |
| 96  | TUTLI8.20.5b | Uninoculated | IGK | Yellow | 2  | Domed |
| 97  | TUTLI8.10.10 | Uninoculated | BBA | Blue   | 10 | Oval  |
| 98  | TUTLI9.20.1  | Uninoculated | CCN | Yellow | 2  | Domed |
| 99  | TUTLI9.20.9  | Uninoculated | EDI | Blue   | 6  | Domed |
| 100 | TUTLI9.20.9b | Uninoculated | EDI | Blue   | 6  | Domed |

---

**Table S5**

Information of nucleotide sequences participated in phylogenetic analysis

| Locus                                         | No. of strains used<br>for tree<br>construction | Nucleotide sequence information |                  |                                |               | Total* | Frequency           |
|-----------------------------------------------|-------------------------------------------------|---------------------------------|------------------|--------------------------------|---------------|--------|---------------------|
|                                               |                                                 | Cnosedved (C)                   | Variables<br>(V) | Parsimony-<br>informative (Pi) | Singleton (S) |        | T/C/A/G<br>(%)      |
| <i>atpD</i>                                   | 48                                              | 248 (65.26)                     | 132 (34.24)      | 75 (19.74)                     | 57 (15)       | 380    | 19.5/31.3/15.5/33.6 |
| <i>glnII</i>                                  | 57                                              | 184 (61.74)                     | 114 (38.26)      | 96 (32.21)                     | 18 (6.4)      | 298    | 17.1/30.4/17.6/35.0 |
| <i>gyrB</i>                                   | 48                                              | 251 (54.57)                     | 209 (45.43)      | 120 (26.1)                     | 89 (19.25)    | 460    | 19.8/31.0/15.9/33.3 |
| Concatenated<br>( <i>atpD</i> + <i>gyrB</i> ) | 41                                              | 509 (60.6)                      | 331 (39.4)       | 170 (20.24)                    | 161 (19.17)   | 840    | 19.6/31.2/15.7/33.5 |
| <i>nifH</i>                                   | 47                                              | 336(63.64)                      | 192(36.36)       | 147(27.84)                     | 45(8.52)      | 528    | 21.8/32.6/19.7/25.9 |

\*number of sites used for tree construction

**Table S6**

Tajimas' neutral mutation test of all test loci

| Nucleotide<br>information | Locus       |              |             |                  |             |
|---------------------------|-------------|--------------|-------------|------------------|-------------|
|                           | <i>atpD</i> | <i>glnII</i> | <i>gyrB</i> | <i>atpD+gyrB</i> | <i>nifH</i> |
| m                         | 48          | 57           | 48          | 41               | 47          |
| S                         | 127         | 114          | 208         | 324              | 192         |
| $P_s$                     | 0.345       | 0.382        | 0.453       | 0.391            | 0.363       |
| $\Theta$                  | 0.078       | 0.083        | 0.102       | 0.092            | 0.082       |
| $\pi$                     | 0.057       | 0.099        | 0.078       | 0.065            | 0.102       |
| $D$                       | -0.956      | 0.663        | -0.865      | -1.085           | 0.871       |

$m$  = number of sequences used,  $S$  = Number of segregating sites,  $p_s = S/n$ ,  $n$  = total number of sites,  $\Theta = p_s/a_1$ ,  
 $\pi$  = nucleotide diversity, and  $D$  is the Tajima neutrality test





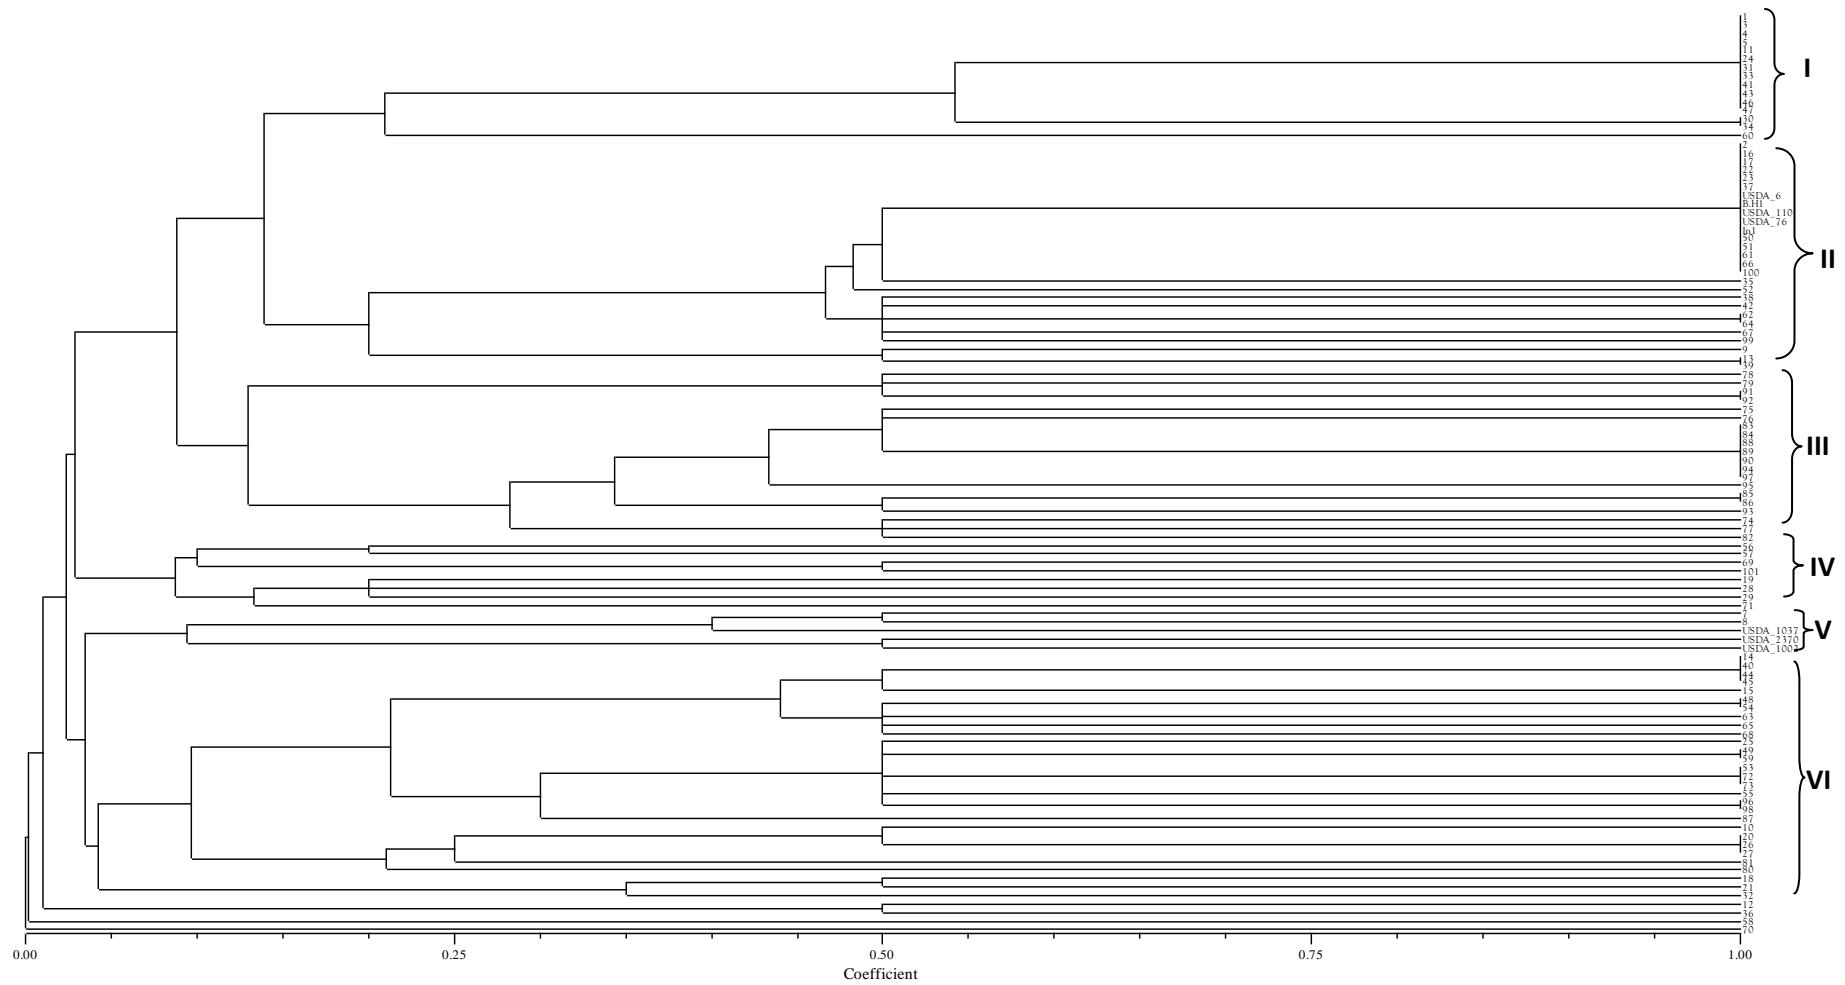

**Fig. S1:** Dendrogram generated from 16S- rDNA-RFLP banding pattern data of soybean nodulating bradyrhizobial isolates

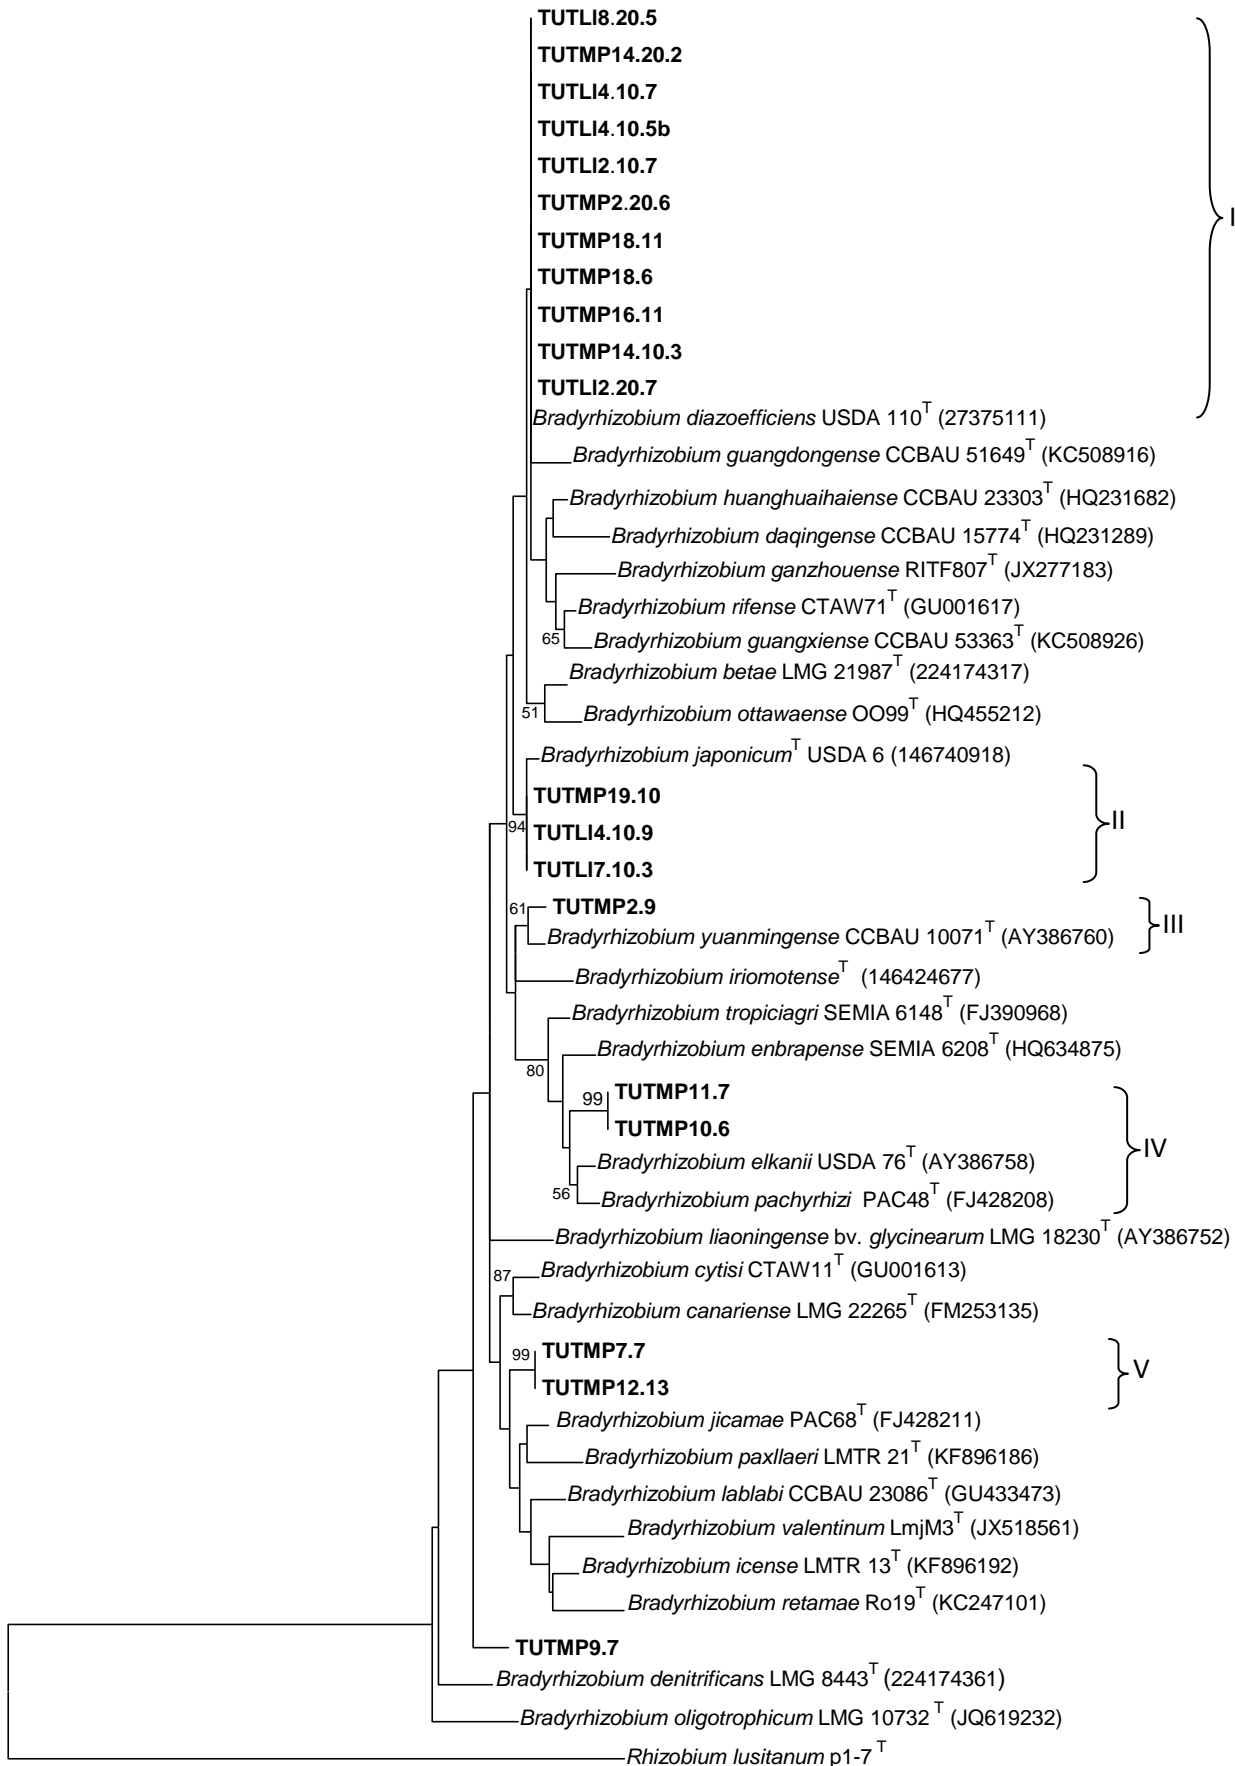

0.1

**Fig. S2:** Phylogenetic tree based on *atpD* sequences generated by Maximum-Likelihood algorithm. Bootstrap values (1000 replicates) are indicated above the branches.

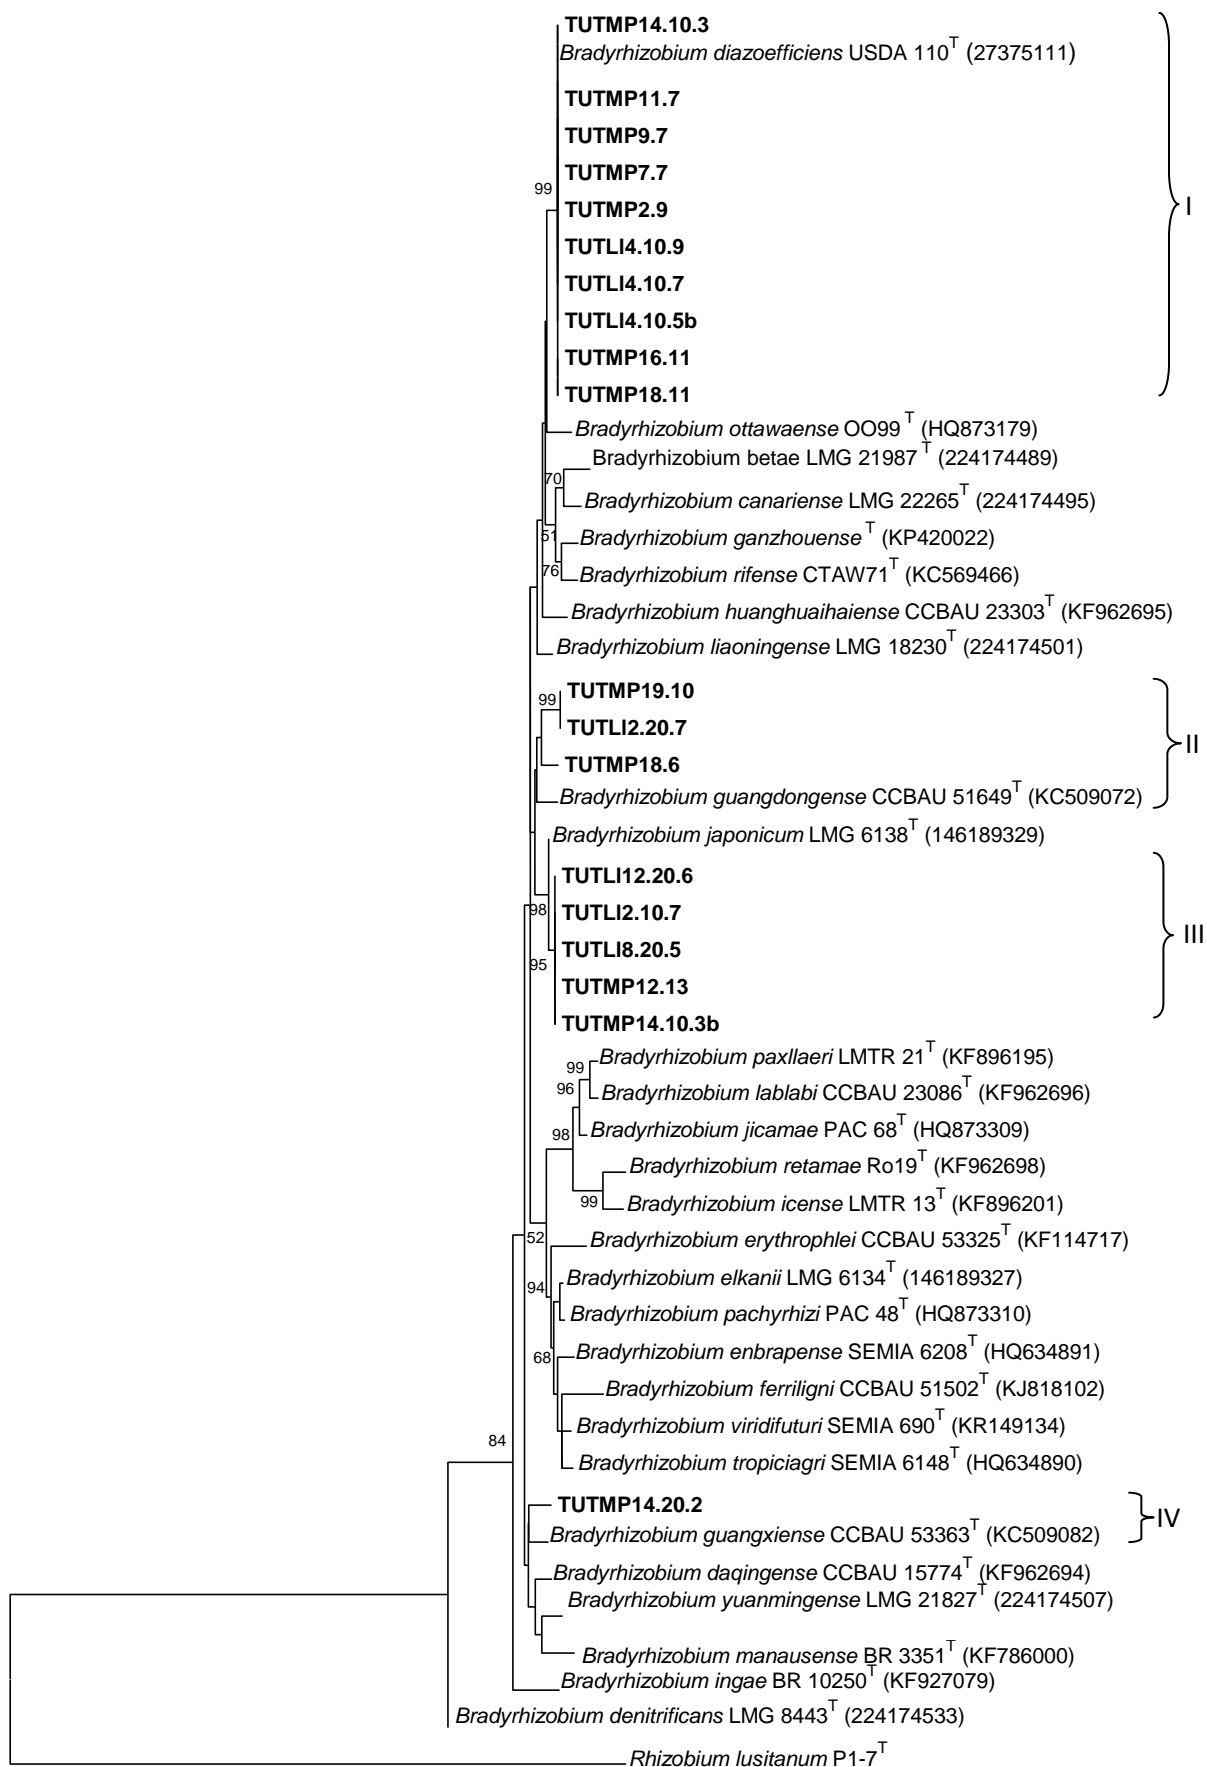

**Fig. S3:** Phylogenetic tree based on *gyrB* sequences generated by Maximum-Likelihood algorithm. Bootstrap values (1000 replicates) are indicated above the branches.
